# Supplementary material
Source: HighWire-hosted journal article supplement (doi:10.1101/rna.078671.120)
Supplement: Supplemental_Table_S1.xlsx [file Supplemental_Table_S1.xlsx]

## Sheet: Sheet1
Name	Sequences
pRNA probes
pRNA-sm-1	CCCACGGGGACTCGGAAA
pRNA-sm-2	GGGACTCGCCAGAAAGGA
pRNA-sm-3	TACGACCGGGACACACGA
pRNA-sm-4	GGAAGCATTTTCGGCCGG
pRNA-sm-5	GTGTCTCCAGAGCGGGAG
pRNA-sm-6	TCAACCCCAGGACACACG
pRNA-sm-7	TCGCAGCCACACACGGAG
pRNA-sm-8	TGTCCCCAAAAACGCCAC
pRNA-sm-9	CGACGCGCGACACGGACA
pRNA-sm-10	AAAGATATACCTCCCCGG
pRNA-sm-11	CCCAAAATGCCGACTCGG
pRNA-sm-12	GCGTGTCAGCAATAACCC
pRNA-sm-13	CAACCTCTCCAGCGACAG
pRNA-sm-14	GTCACCGGTAGGCCAGAG
pRNA-sm-15	AGGCGGCTCAAGCAGGAG
pRNA-sm-16	CGAGAGAACAGCGACCCG
pRNA-sm-17	GAGTCGGGACGCTCGGAC
pRNA-sm-18	GACACGCACGGCACGGAG
pRNA-sm-19	CCGCGGAGACGAGAACGC
pRNA-sm-20	GAAGGGGCGGCGGACAAG
NORAD probes
NORAD-sm-1	TAGAATGAAGACCAACCGCC
NORAD-sm-2	CATTCTACCATTTCTCTCTT
NORAD-sm-3	ATACACAGGCCTTCCATAAA
NORAD-sm-4	CCATCTAGAAGGGCTAGATG
NORAD-sm-5	AAACGTGGACGTATCGCTTC
NORAD-sm-6	CCCCCAAAAATATTTCCTAT
NORAD-sm-7	AACAGGATGGCATAGAGCTC
NORAD-sm-8	ATACACTGGCAACCTCTTTA
NORAD-sm-9	ATGTGAACATTCTGGCCTAG
NORAD-sm-10	CATACATCGGGCACTTCTAA
NORAD-sm-11	TACTGTTCACAAAGGTGGCT
NORAD-sm-12	TACCTTTTGCAATTTCTTCC
NORAD-sm-13	ATACACTGGCAACCTCTTTA
NORAD-sm-14	CAAACAGCATTTCCCATCAG
NORAD-sm-15	CATACATTGGCAACCTCTTT
NORAD-sm-16	TTTCAGAAGACAGCCTTTCT
NORAD-sm-17	AACATTCTGGTCTAGAACCC
NORAD-sm-18	GACTTAAGTTTGTCCGCTAT
NORAD-sm-19	TGTCATATACTGGCAACCTT
NORAD-sm-20	ACAGCTATAAGCCATCTGTA
NORAD-sm-21	AGGAACATTCTGGCCTAGAA
NORAD-sm-22	CCTCTACTGTTAACCTACAT
NORAD-sm-23	ATTCCATTCCCAAATGCAAC
NORAD-sm-24	TGAATAGTCTGCATTCGCTC
NORAD-sm-25	AATCTCAGGAGCACAGAACC
NORAD-sm-26	TGTAGACCTGTGGTTATCAT
NORAD-sm-27	ACAGCCAAGAGATGCATACA
NORAD-sm-28	AATGCTGCATTCCCTTAATG
NORAD-sm-29	GGGACTGAGACTGTACAGTA
NORAD-sm-30	ATTCTTCTAGATCCTGTGTG
MALAT1 probes
MALAT1-N-sm-1	AGTCCTTTACAGAAGTCTCG
MALAT1-N-sm-2	AAAATGGCGCTGCGCTTAAG
MALAT1-N-sm-3	CAAGGACTCTGGGAAACCTG
MALAT1-N-sm-4	AGGACAGCTAAGATAGCAGC
MALAT1-N-sm-5	CTAAATACCACCACCTGGAA
MALAT1-N-sm-6	TATGAGCTTCAGACCTTCTG
MALAT1-N-sm-7	CAGATTCTGTGTTATGCCTG
MALAT1-N-sm-8	ACACCCAGAAGTGTTTACAC
MALAT1-N-sm-9	GAAGACACAGAGACCTTGGG
MALAT1-N-sm-10	TGGCCTTTTAAAGTAGACCA
MALAT1-N-sm-11	CAAGGCAAATCGCCATGGAA
MALAT1-N-sm-12	GCACGGAAATTTTTCTACCG
MALAT1-N-sm-13	CTTGGAAAACGCCTCAATCC
MALAT1-N-sm-14	CTGTCTGCTTGGGAAATCTT
MALAT1-N-sm-15	TGGCAAAATGGCGGACTTTC
MALAT1-N-sm-16	GTGATAGTTCAGGGCTTTAC
MALAT1-N-sm-17	AGGTATAGTTTACCACCTTT
MALAT1-N-sm-18	CACTTCTTGTGTTCTCTTGA
MALAT1-N-sm-19	ACCCCCGGAACTTTTAAAAT
MALAT1-N-sm-20	AACGGGTCATCAAACACCTC
MALAT1-N-sm-21	GCGTGTGGAAAGATTTGAGC
MALAT1-N-sm-22	CCTTTGTGAGGGAGGCAAAA
MALAT1-N-sm-23	CATCACCGGAATTCGATCAC
MALAT1-N-sm-24	GCGAGGCGTATTTATAGACG
MALAT1-N-sm-25	GCCCTTCTATTGGTATTAAT
MALAT1-N-sm-26	AGGTCTTTTAATCACCTTCG
MALAT1-N-sm-27	AAATGACGCAATTCTCCCTG
MALAT1-N-sm-28	TCTGCGTTTAGTAAATGCGT
MALAT1-N-sm-29	CTCCCAATTAATCTTTCCAT
MALAT1-N-sm-30	TTCTCCAAATTGTTTCATCC
MALAT1-M-sm-1	CGAATTCAGGGTGAGGAAGT
MALAT1-M-sm-2	CCTCAGTTACACATCCAAAC
MALAT1-M-sm-3	AGTCATTTGCCTTTAGGATT
MALAT1-M-sm-4	AACTGTAAACCTGTGGTGGT
MALAT1-M-sm-5	CGTGAGAACTGCTCTAGTTT
MALAT1-M-sm-6	TGGACATCTCTTCCACAGAC
MALAT1-M-sm-7	AGTACTATAGCATCTGTGGA
MALAT1-M-sm-8	CGGTACACTCCTTCTCTAAC
MALAT1-M-sm-9	CCAAGGATAAAAGCAGCTCC
MALAT1-M-sm-10	ACTTTTCAGCTTCAACTGGG
MALAT1-M-sm-11	ATGAACCAAAGCTGCACTGT
MALAT1-M-sm-12	AACATTTGGCCTACTCAAGC
MALAT1-M-sm-13	CCTCCCCTTTAATAAAACTT
MALAT1-M-sm-14	ACTGCCAACTAATTGCCAAT
MALAT1-M-sm-15	AACAATTACCTAAACCCACC
MALAT1-M-sm-16	TGGCATGAGTTTATCTGCAA
MALAT1-M-sm-17	ATTGGGAGTTACTTGCCAAC
MALAT1-M-sm-18	CCAGTGGCTCATATTTAACT
MALAT1-M-sm-19	ACTTTCCTTGCCCAAATTAA
MALAT1-M-sm-20	ATTGTAGTTAATGTCAGCCC
MALAT1-M-sm-21	GAACCACACACTACCATATC
MALAT1-M-sm-22	CTTCAGGATCATTAAGCCAC
MALAT1-M-sm-23	CCTTAACATCTTGTTTTGCA
MALAT1-M-sm-24	CACCCTCTAAGAGACATTCA
MALAT1-M-sm-25	TTTTCTGCCTTTACTTATCA
MALAT1-M-sm-26	CCCAATGGAGGTATGACATA
MALAT1-M-sm-27	AAGAATCTCAGGGTTATGCT
MALAT1-M-sm-28	ATGGTAGATTCCGTAACTTT
MALAT1-M-sm-29	GCTTCTTTTATTCCAGGATT
MALAT1-M-sm-30	CCCAACTCATCTCTCATTTA
MALAT1-C-sm-1	CTGTTGCTTGTTTGGAATGT
MALAT1-C-sm-2	TTTTTTCTTACTGGGTCTGG
MALAT1-C-sm-3	AGAACTAGTGGTTCCCAATC
MALAT1-C-sm-4	GAAGCTCCTTCTATAGTCTG
MALAT1-C-sm-5	TCATTTTGTCCACTGGTGAA
MALAT1-C-sm-6	TTGTCCCATAACTGATCTGA
MALAT1-C-sm-7	AACACAGTTTGCTCACATGC
MALAT1-C-sm-8	ATGGTTGTCCTACTTTAAGC
MALAT1-C-sm-9	TGACACTTCTCTTGACCTTA
MALAT1-C-sm-10	TTGAGGCAAGTCCTCATTAC
MALAT1-C-sm-11	GGATGCTTCACTCCAGAAAG
MALAT1-C-sm-12	GCTTGAGATTTGGGCTTTAT
MALAT1-C-sm-13	AGCTAGGGAAAAGTGGTTGC
MALAT1-C-sm-14	CTTGCTTTTAACAGGCTTCT
MALAT1-C-sm-15	AGATCAAAAGGCACGGGGTG
MALAT1-C-sm-16	ACAAGGATCCAAGCTACTGG
MALAT1-C-sm-17	CATCGTTACCTTGAAACCGA
MALAT1-C-sm-18	TAACATAGTTCAACCCACCA
MALAT1-C-sm-19	TTGCAGGCAAATTAATGGCC
MALAT1-C-sm-20	TGTGGTTTTAATACCCTTCT
MALAT1-C-sm-21	GTTGGTTTTAGTCACTGGAT
MALAT1-C-sm-22	GTTATTTCTCCACTTACTGG
MALAT1-C-sm-23	CTATCTTCTCCAGTCTACAA
MALAT1-C-sm-24	CAAGTCTGTTATGTTCACCT
MALAT1-C-sm-25	AAGAGCATTGGAGATCAGCT
MALAT1-C-sm-26	CCCCAAAACTCCAAGAACTA
MALAT1-C-sm-27	AGATATTGTGCTGTTACCTC
MALAT1-C-sm-28	TCAAGTCAAGCTCCTGACAA
MALAT1-C-sm-29	CTGCAGGCTATTACCTGAAA
MALAT1-C-sm-30	AGCAGTAGGGCTTCTCAAAA
NEAT1 probes
Neat1-5-sm-1	CAAACAGGTGGGTAGGTGAGAG
Neat1-5-sm-2	TGGTCTGGAAAAAAAGGGGCTG
Neat1-5-sm-3	AAACTAGTATGACCGGAGGCTC
Neat1-5-sm-4	TCTCCGAGAAACGCACAAGAAG
Neat1-5-sm-5	CGAGCGAAAATTACATACCACC
Neat1-5-sm-6	AAGGCCTGGAAACAGAACATTG
Neat1-5-sm-7	GAAGATGCAGCATCTGAAAACC
Neat1-5-sm-8	TACAAGGCATCAATCTGCGTTG
Neat1-5-sm-9	GCAAGAACAAAAGAGCACTACC
Neat1-5-sm-10	AAAACTGGTGACTCTGTGTCAC
Neat1-5-sm-11	ATGGACAAGTTGAAGATTAGCC
Neat1-5-sm-12	AGCTAAGTTCAGTTCCACAAGA
Neat1-5-sm-13	ACCTGGAAAATAAAGCGTTGGT
Neat1-5-sm-14	GTGAGCTCACAAGAAGAGTTTA
Neat1-5-sm-15	TTACCAACAATACCGACTCCAA
Neat1-5-sm-16	CACTATAGTAACAAACCACGGT
Neat1-5-sm-17	TCTTCTTGAAGCAAGGTTCCAA
Neat1-5-sm-18	CGTTTAGCACAACACAATGACA
Neat1-5-sm-19	ACACACAGATTTAGGAATGACC
Neat1-5-sm-20	AATCACAATGCCCAAACTAGAC
Neat1-5-sm-21	CCTCTTACTAGAATGCCAAGAA
Neat1-5-sm-22	GAGGAAGCTGGTAAAGACATTT
Neat1-5-sm-23	GACCAGGTAATGTTTTAAGTGA
Neat1-5-sm-24	TTTTGTAACTTTCAGCTGGATG
Neat1-5-sm-25	AAATTCAATCTGCAGGCATCAA
Neat1-5-sm-26	TGCTGTGGACTTTTTAAGATTG
Neat1-5-sm-27	CTCTGGAACAAGCATTTATTCA
Neat1-5-sm-28	CCAAGTTATTTCATCAGGCTAA
Neat1-5-sm-29	TTTCTAAGCAACTTCTCACTTC
Neat1-5-sm-30	TTCAGTTAACACTTCTTCAGTC
Neat1-5-sm-31	ACGTTAAAATGTTCTACAGCTT
Neat1-5-sm-32	CAATCTGCTTCCTCTAATATAT
Neat1-mr-sm-1	ATAAATTCATACACTCCACAGC
Neat1-mr-sm-2	CCTTTTTCTATAGTGTTTGAAT
Neat1-mr-sm-3	CGGGATTATAGAGGAACTTTTA
Neat1-mr-sm-4	AGTTGTCATTAGTAGTTATCTT
Neat1-mr-sm-5	GGGCAGAGAATAATAGGATACA
Neat1-mr-sm-6	ATATGACATGTTATAGAGCCAT
Neat1-mr-sm-7	CAGAGGGATGCAAAAGAGATCC
Neat1-mr-sm-8	TTCAACCCATCTCACAAAACAG
Neat1-mr-sm-9	ACCAACATTATTCTATTTTGGC
Neat1-mr-sm-10	GTAGGGGAAAGAATACCAGGAA
Neat1-mr-sm-11	TACAAATGTCACAGACGCTTTC
Neat1-mr-sm-12	GATGCCACTTAAGATTTCAACA
Neat1-mr-sm-13	AGAAGACAGAAAGTGTGTGCTT
Neat1-mr-sm-14	TATTTCCTTCTAGAGGTAGTAA
Neat1-mr-sm-15	CTTGACAGAAGAGTAACAGGGA
Neat1-mr-sm-16	TTGCTTTGACACACAGATGATG
Neat1-mr-sm-17	CTGGAAGGAAACTAGCAAAGCA
Neat1-mr-sm-18	TATGGCTTTGAACAGTTTTCAC
Neat1-mr-sm-19	AGGGTTTGAAGTTCAAACATGT
Neat1-mr-sm-20	AGAGAAAGATGCCACTGAATCA
Neat1-mr-sm-21	GCCTTTTCAAACTACTCACAAA
Neat1-mr-sm-22	CCTGTCACTTGTTATGCTAAAA
Neat1-mr-sm-23	TGTATTAGCCAGAAAATGGTGT
Neat1-mr-sm-24	GGGAAGGTTAAGGTAAACATGC
Neat1-mr-sm-25	TTGCATAAGAAGACAACGGCAT
Neat1-mr-sm-26	AAGACCAGCTTTCTGTGTAATG
Neat1-mr-sm-27	AAAAGTACTCTGTGATGGGGTA
Neat1-mr-sm-28	TATCAAGTAACCATTAGGCAGA
Neat1-mr-sm-29	AAGCTGGGTTTGTATGAACTTA
Neat1-mr-sm-30	CAGTGGCAGAAGCTTGGAAAAC
Neat1-mr-sm-31	AGCATGGCAACATATTTTGTAA
Neat1-mr-sm-32	ACCATCATAAATGGAAAACCGG
Neat1-ml-sm-1	TCACCTGATCTGAGGATAAATG
Neat1-ml-sm-2	GATTAGCAATAATTGCTGGCAC
Neat1-ml-sm-3	TCAGATCTATGCATAAGGATGC
Neat1-ml-sm-4	ACCTCTGGAAATTCACAAAGTC
Neat1-ml-sm-5	CCACTCACTGAATTCTATTATA
Neat1-ml-sm-6	TCAACTTTTGCTATTCTTATGC
Neat1-ml-sm-7	TACTGAAGAGCCTCAACCAATA
Neat1-ml-sm-8	ATAATGAGTACCACACAAAGCC
Neat1-ml-sm-9	GTTAGTATTCATTTTGCTATCT
Neat1-ml-sm-10	AACATGTACCTGTTCATCTTTT
Neat1-ml-sm-11	AAGCAAATGTGCCCATAACAAT
Neat1-ml-sm-12	CCCATGCATACAAAAGAAATCT
Neat1-ml-sm-13	CACCAGTGAGAACACTAATTGA
Neat1-ml-sm-14	AGGAGCAAAGGTTTTCAATGTG
Neat1-ml-sm-15	CAGACAAAGCAATGCTCACATC
Neat1-ml-sm-16	GACACAAGGTAGAGATGTTCAG
Neat1-ml-sm-17	TCCTTAAGATGTAAATGGCTTT
Neat1-ml-sm-18	ATCGTTTAACTTTTATCTACCT
Neat1-ml-sm-19	GATCTACACATAACAAGTTCAG
Neat1-ml-sm-20	AATATTTATGTACTCTTGGGGT
Neat1-ml-sm-21	ACCATACAAGTTCCATAAGAAA
Neat1-ml-sm-22	TCAAGGTCTTCTGAATTGAACC
Neat1-ml-sm-23	GTGAGAGCTCAACAAGGAGTAG
Neat1-ml-sm-24	GGTACAGGGAAATACTACTGGA
Neat1-ml-sm-25	AAAGCCTCTTCAAATGTGTTTG
Neat1-ml-sm-26	GAAAGTTATGCTTTCCACAGAA
Neat1-ml-sm-27	GATCTTTTTTGAGCACGAACAA
Neat1-ml-sm-28	GGCTACATATCCTTTAGTATAA
Neat1-ml-sm-29	AATTTACAGAGATGCTCACAGC
Neat1-ml-sm-30	AGTCATTTGAGTCTGTGAAGAG
Neat1-ml-sm-31	TACTCACAACAGGAAGTGTAGC
Neat1-ml-sm-32	TTAGTGGCTATGTAGGGAAATG
Neat1-5-sm-1	CAAACAGGTGGGTAGGTGAGAG
Neat1-5-sm-2	TGGTCTGGAAAAAAAGGGGCTG
Neat1-5-sm-3	AAACTAGTATGACCGGAGGCTC
Neat1-5-sm-4	TCTCCGAGAAACGCACAAGAAG
Neat1-5-sm-5	CGAGCGAAAATTACATACCACC
Neat1-5-sm-6	AAGGCCTGGAAACAGAACATTG
Neat1-5-sm-7	GAAGATGCAGCATCTGAAAACC
Neat1-5-sm-8	TACAAGGCATCAATCTGCGTTG
Neat1-5-sm-9	GCAAGAACAAAAGAGCACTACC
Neat1-5-sm-10	AAAACTGGTGACTCTGTGTCAC
Neat1-5-sm-11	ATGGACAAGTTGAAGATTAGCC
Neat1-5-sm-12	AGCTAAGTTCAGTTCCACAAGA
Neat1-5-sm-13	ACCTGGAAAATAAAGCGTTGGT
Neat1-5-sm-14	GTGAGCTCACAAGAAGAGTTTA
Neat1-5-sm-15	TTACCAACAATACCGACTCCAA
Neat1-5-sm-16	CACTATAGTAACAAACCACGGT
Neat1-5-sm-17	TCTTCTTGAAGCAAGGTTCCAA
Neat1-5-sm-18	CGTTTAGCACAACACAATGACA
Neat1-5-sm-19	ACACACAGATTTAGGAATGACC
Neat1-5-sm-20	AATCACAATGCCCAAACTAGAC
Neat1-5-sm-21	CCTCTTACTAGAATGCCAAGAA
Neat1-5-sm-22	GAGGAAGCTGGTAAAGACATTT
Neat1-5-sm-23	GACCAGGTAATGTTTTAAGTGA
Neat1-5-sm-24	TTTTGTAACTTTCAGCTGGATG
Neat1-5-sm-25	AAATTCAATCTGCAGGCATCAA
Neat1-5-sm-26	TGCTGTGGACTTTTTAAGATTG
Neat1-5-sm-27	CTCTGGAACAAGCATTTATTCA
Neat1-5-sm-28	CCAAGTTATTTCATCAGGCTAA
Neat1-5-sm-29	TTTCTAAGCAACTTCTCACTTC
Neat1-5-sm-30	TTCAGTTAACACTTCTTCAGTC
Neat1-5-sm-31	ACGTTAAAATGTTCTACAGCTT
Neat1-5-sm-32	CAATCTGCTTCCTCTAATATAT
U3 snoRNA probes
U3-sm-1	GGTGCTCTACACGTTCAG
U3-sm-2	TCTCTTCCTCGTGGTTTT
U3-sm-3	GCTTCACGCTCAGGAGAA
U3-sm-4	AGCCAAGCAACGCCAGAA
U3-sm-5	TCAATGGCTGACGGCAGT
U3-sm-6	CTCCCCAATACGGAGAGA
U3-sm-7	CACTCAGACCGCGTTCTC
ITS2 probes
ITS2-sm-1	GCCACCCGACGCGTGACCAC
ITS2-sm-2	CGTCTCTCTCAGCCGGGCGC
ITS2-sm-3	TCCGTCTTCCGGCGGCGGCG
ITS2-sm-4	CGAGCCGGCTCTCTCTTTCC
ITS2-sm-5	GCGGCGGCCACGGGAACTCG
ITS2-sm-6	CGAGGGAGGAACCCGGACCG
ITS2-sm-7	CGCGCGCGGCGCGAGGGAGC
ITS2-sm-8	GGGGCCGACGAACCCCGAAC
ITS2-sm-9	ACGGGCACGGGACCTTCCAC
ITS2-sm-10	GACGACGCGCGACGACGACG
ITS2-sm-11	CACCACACCGCACGCAACAC
ITS2-sm-12	CTTCCGGACCCGCCTTCCTC
ITS2-sm-13	CTCTCCCCGCCGGCACCCTT
ITS2-sm-14	CGGCGACCGGGACGCGCTCC
ITS2-sm-15	ACCGGGGGCGGGCGGCGGAA
ITS2-sm-16	CGGTCGGCCGGACGCCGGGC
ITS2-sm-17	AGGAGGAGGGGCGCGGGGAG
ITS2-sm-18	GGGCCTCGGAGGAGGGGCGG
ITS2-sm-19	GGGGAGGGCGAGGAGGACGG
ITS2-sm-20	GGCGGGCGCGCGCGCGTACG
ITS2-sm-21	CGACGCGCCGCGAGGCGAGC
ITS2-sm-22	CACGGGCGGGCGGCGGGGCG
ITS2-sm-23	GGGACACGCGAACCCCGGCG
ITS2-sm-24	CGGCGTCCCGCGGGTCGCCG
ITS2-sm-25	GCGCGCGACGGCGGACGACA
ITS2-sm-26	GCGCGGCCGCGAGCCGGAGG
ITS2-sm-27	CGACGCGGAAGCTCGGGACG
ITS2-sm-28	CGAGGACGCGGCGGCGGAGC
ITS2-sm-29	CGCGGAGGTCGGGGGGACGG
ITS2-sm-30	CGCACGCCCCGGCGCGTCTC
ITS2-sm-31	CACGGGCCGGGGGCGGGACG
ITS2-sm-32	AGCGGGACGACCGGAGGGAG
ITS2-sm-33	AGAGAGAGCGCGCGGCCGAC
ITS2-sm-34	CGGCGAGGGGGAGAGGCGAC
scaRNA probes
U85-sm-1	GCCTTGATATCATCATGT
U85-sm-2	GGGCTTAGCCAAACCAAC
U85-sm-3	TAACAGGCCAAAGGTCCC
U85-sm-4	CGCCCACCAAGATTACAG
U85-sm-5	GTCTGCCCTTACAGTGAA
U85-sm-6	ACTGGAAGAATCACCCCT
U85-sm-7	CCACAATTTCTCTCCAGC
U85-sm-8	CTACTCTCTCACTCCAGT
U85-sm-9	CCCTGATACCCTGAACAT
U85-sm-10	AGTCCTTTAGGACCCTTG
U85-sm-11	GTGGCCATAACACAAGCT
U85-sm-12	GATCTGTGTTTCATCTCT
CCAT1 probes
CCAT1S-sm-1	TTAACACGGCAGCTGGTAATG
CCAT1S-sm-2	TTTTTCTGTGAATCGTGAGCG
CCAT1S-sm-3	ATTCATCCAGCTAGCTATTAA
CCAT1S-sm-4	CAATGTACAGGGCTTATTGTT
CCAT1S-sm-5	AAGACCAAAGTTCATGTCTCG
CCAT1S-sm-6	AGTGAATGCTCCAGATGGATT
CCAT1S-sm-7	CAGGTCAGTGCAACTTCAAAG
CCAT1S-sm-8	AAACGCTTAGCCATACAGAGC
CCAT1S-sm-9	CACAGTTTTCAAGGGATTTTA
CCAT1S-sm-10	AAGATATGATCTTCTTATGGT
CCAT1S-sm-11	AGCTGCGGATAACAGCATATA
CCAT1S-sm-12	TTGACAGTAGCTGTGATGCTC
CCAT1S-sm-13	TCCGGTGTTTTTTCAGAAAGA
CCAT1S-sm-14	TGTTTAGTCAAATCAGATCCG
CCAT1S-sm-15	AATGGGAGTAGATTGGGTGAT
CCAT1S-sm-16	TGTGCTTTGGATTTGAGACAC
CCAT1S-sm-17	ATCTTCTCAATGCCAAAGAGG
CCAT1S-sm-18	TTTGCACTTGCTAGTTGGGAC
CCAT1S-sm-19	TTGAGAAGGGGTGAAGGGACA
CCAT1S-sm-20	TGCCAAGGCTGTTATTGTCAA
CCAT1S-sm-21	TGTAACAGTTCCTATTACACC
CCAT1S-sm-22	ATAGTGATTGTAGCAACTAGC
CCAT1S-sm-23	AGGCTCAAGCATAAATGGGAC
CCAT1S-sm-24	AGTAATTTTGTGTCAGGCTTG
CCAT1S-sm-25	TCAATTAGGACTCACACATCC
CCAT1S-sm-26	TTGGTCCACAATTCCCTTAAG
CCAT1S-sm-27	ATTAAGATACGGCTTTCTGCC
CCAT1S-sm-28	ACACCTTGCCTGAAATACTTG
CCAT1S-sm-29	GTCTGCTTGAATTCAAATGGC
CCAT1S-sm-30	GTACACACCTTCTTTCTCATC
CCAT1S-sm-31	GGTGAGCTAAAGTTCAAAGAT
CCAT1S-sm-32	AGAGAATACTCAGCCTTCTTC
CCAT1S-sm-33	AGTAGGCATTAGCTACTATGT
CCAT1S-sm-34	ACAGAAAGAATTGTGGGTGGC
CCAT1S-sm-35	TCACAAAGTATTCTAGCGAGC
TERRA probes
TERRA-sm	TAACCCTAACCCTAACCC
PNCTR probes
PNCTR-sm-1	ACAAACAGGGAGGGAGAGAGA
PNCTR-sm-2	AAACAGACAGGGAGGGAGAGA
PNCTR-sm-3	GAGAGGCAGACAGACAGAGA
PNCTR-sm-4	ACAGACAGACAGACAGGCAG
PNCTR-sm-5	AGACAGAGACGGAGACAGAGA
PNCTR-sm-6	ACAGTGAGACAGGCAGAGAG
PNCTR-sm-7	AAGACGGAGACAGGCAGAGA
PNCTR-sm-8	GAGAGGCAGAGACAGAGACA
PNCTR-sm-9	AGATAGGCACAGACAGAGAGA
PNCTR-sm-10	GACGGAGAGACAGTGAGTGA
PNCTR-sm-11	GTGTCTGACAGACTGACAGA
PNCTR-sm-12	CCGTTTATGTTGAAGTCGAG
PNCTR-sm-13	ACTAAATCGACCCTTAGGAC
PNCTR-sm-14	TGGCGGTGAAAGAGGCATGA
PNCTR-sm-15	TCTAGATGAGAACACGCGGT
PNCTR-sm-16	ATAGGTAAACTTGTGACGGGG
PNCTR-sm-17	GGAAGGTGGATCATTTGTGG
PNCTR-sm-18	CGCGCTTTTAAAGGCTGAAA
PNCTR-sm-19	ACACGTCATTCTGAGCGTAA
PNCTR-sm-20	AAGGAGTCAACCTATGGCAG
PNCTR-sm-21	ACACTTATGGGTGACGTGTA
PNCTR-sm-22	AATCACTCCTCACGGGAACA
PNCTR-sm-23	GAGGCAGACAGAGAGAGACA
PNCTR-sm-24	GCAGAAAGGGAGGGAGAGAC
PNCTR-sm-25	AGACAGATAGACAGGCAGAGA
PNCTR-sm-26	AGACAGATGGACAGGCAGAG
PNCTR-sm-27	ACACAGTGAGAGAGGCAGAG
PNCTR-sm-28	GAGAGAGAGACAGGCAGACA
PNCTR-sm-29	ACAGTGAGAGAGACAGGCAG
PNCTR-sm-30	GACAGACAGACAGACAGGGA
RTN4 probes
RTN4-L-1	CAGATGAGCTAGGAGTGAGG
RTN4-L-2	CTCCCGGAACAATGAGACTG
RTN4-L-3	GACGAGACCAGAGGAGACTG
RTN4-L-4	GAACTGGTACTTGAACGCGG
RTN4-L-5	GCACGAAGTCATTTCCGAAG
RTN4-L-6	AGGAGGTCAACAACCACTGA
RTN4-L-7	TCCAGTCTTCTTAATGTCTC
RTN4-L-8	GAAAGCAGCAGGAATAGGCT
RTN4-L-9	TGTTACGCTCACAATGCTGA
RTN4-L-10	TCACAGAGAGCAGGGCCAAG
RTN4-L-11	ACCCTTGTATATCCTAAAGC
RTN4-L-12	CTGATTTCTGGATAGCTTGG
RTN4-L-13	ACTCCTCAGATATAGCAACT
RTN4-L-14	GCAGAATTACTGTACTTCTG
RTN4-L-15	CTTTATCGTGCAGTTCACAT
RTN4-L-16	CAACTAAGAAGAGGCGCCTG
RTN4-L-17	AAACAAGGCACCAACATAGG
RTN4-L-18	GCCAAAATCAGTAGTGTCAG
RTN4-L-19	ACAGGAACACTGAAGAGTGA
RTN4-L-20	ATGATCTATCTGTGCCTGAT
RTN4-L-21	CATTCTTATTTGCAAGTCCT
RTN4-L-22	TTGCTTGGATTTTAGCCATA
RTN4-L-23	ATTCAGCTTTGCGCTTCAAT
RTN4-L-24	CCTACTAATTATTTTGGGCG
RTN4-L-25	TCCCCCGTATAATCAAATGA
RTN4-L-26	AACGTCAAGGTTCGTTCTTC
RTN4-L-27	ACAACGATCTGTGAAACTGC
RTN4-L-28	TTTCCTCACAACAGTGCATG
RTN4-L-29	ACACATGGCAGTCAAGACAG
RTN4-L-30	TCCATACATAGCAGCTTACA
RTN4-L-31	TGCCTCAGATAGATAGGAAA
RTN4-L-32	AGATGCGGCAAGACTATCTG
RTN4-L-33	TACACGGACCATACACAGTG
RTN4-L-34	CCGGTATGATCTCGTCTAAA
RTN4-L-35	AAGCAAGCTTTGTCATTCCT
RTN4-L-36	GGTAAAGGTCTAAGCTTTGT
RTN4-L-37	AATATCAAGCACTGTGGGGT
RTN4-L-38	ATGTGCTTTGGAACTACACA
RTN4-L-39	AAACAGATGGTAGTGCTCCT
RTN4-L-40	TTCTATGTGTGTGGCATTTC
RTN4-L-41	ACAGTCAGTCTGTGCAATGA
RTN4-L-42	TCAGTCCATAGATTCTGTGA
RTN4-L-43	TTCCACAGATTTAGTTCAGT
RTN4-L-44	CTTTGCTTTTACAGTTCACA
28S probes
28S-sm-N-1	TTTGCTACTACCACCAAGAT
28S-sm-N-2	CCTTCAAAGTTCTCGTTTGA
28S-sm-N-3	TTCAACTGCTGTTCACATGG
28S-sm-N-4	ATCTCTCAGGACCGACTGAC
28S-sm-N-5	CGGATTCGGGGATCTGAACC
28S-sm-N-6	CCTGCCCTTCACAAAGAAAA
28S-sm-N-7	ATTTTCAAGGGCCAGCGAGA
28S-sm-N-8	AGCTCAACAGGGTCTTCTTT
28S-sm-N-9	TTCACCGTGCCAGACTAGAG
28S-sm-N-10	CACTTATTCTACACCTCTCA
28S-sm-N-11	AGAGTAGTGGTATTTCACCG
28S-sm-N-12	CTCACCGGGTCAGTGAAAAA
28S-sm-N-13	TTACCGTTTGACAGGTGTAC
28S-sm-N-14	AAGATCAAGCGAGCTTTTGC
28S-sm-N-15	TTTCACGGTCTGTATTCGTA
28S-sm-N-16	AGGTCAGAAGGATCGTGAGG
28S-sm-N-17	TGACACCTCCTGCTTAAAAC
28S-sm-N-18	AGTTATCCCTGTGGTAACTT
28S-sm-N-19	GACGTCGCTATGAACGCTTG
28S-sm-N-20	GCCGACATCGAAGGATCAAA
28S-sm-N-21	TCTGCTTCACAATGATAGGA
28S-sm-N-22	GAACAATCCAACGCTTGGTG
28S-sm-N-23	CAGCTCACGTTCCCTATTAG
28S-sm-N-24	AACTAACCTGTCTCACGACG
28S-sm-N-25	GGCAACAACACATCATCAGT
28S-sm-N-26	CTCGTACTGAGCAGGATTAC
28S-sm-N-27	AAATGTCTGAACCTGCGGTT
28S-sm-N-28	TCATAATCCCACAGATGGTA
28S-sm-N-29	GATTCTGACTTAGAGGCGTT
28S-sm-N-30	GGTCGTCTACGAATGGTTTA
28S-sm-N-31	ACGACCGATTTGCACGTCAG
28S-sm-N-32	ATTAGTCTTTCGCCCCTATA
28S-sm-N-33	AGGGAACCAGCTACTAGATG
28S-sm-N-34	AGCTATCCTGAGGGAAACTT
28S-sm-N-35	CGGATAAAACTGCGTGGCGG
28S-sm-N-36	AGACCTCTAATCATTCGCTT
28S-sm-N-37	ATAGGTTGAGATCGTTTCGG
28S-sm-N-38	GGCTTCTTACCCATTTAAAG
28S-sm-N-39	TTCTGCTTACCAAAAGTGGC
28S-sm-N-40	CTTTTCTGGGGTCTGATGAG
28S-sm-N-41	GTCCTGCTGTCTATATCAAC
28S-sm-N-42	GAGTTGTTACACACTCCTTA
28S-sm-N-43	CATTTTCAGGGCTAGTTGAT
Poly A probes
Poly A	TTTTTTTTTTTTTTTTTTTTTTTTTTTTTTTTTTTTTTTT
SL49 probes
SL49-sm-1	CACCAGAGAGCCTCTCAC
SL49-sm-2	ACGTTCCATGTTAAACCC
SL49-sm-3	AACGCCAATTTCCGTGCA
SL49-sm-4	CCACCCTATGCAATGACA
SL49-sm-5	GCCATCTCCAGTTTCTAT
SL49-sm-6	GGTTAGGACTGTGGCTGA
SL49-sm-7	AACCCTGCTACTGGAGAC
SL49-sm-8	ATCTAGACCCTACCTGAA
SL49-sm-9	CAGTACTGTTCCAACCGC
SL49-sm-10	TCAAGCACCTCACAACCC
SL49-sm-11	CTGCGGTCAGATAGACAT
SL49-sm-12	AGTTGTAGAGGTTTCAGC
SL49-sm-13	CTTCAGCACTCTGCAGTG
SL49-sm-14	TGGCAGTTACGGTCAACT
SL49-sm-15	AGGAATTCAGGGCAGGGC
SL49-sm-16	CTTAAAGAGGGAGTAAGG
SL49-sm-17	AAAACACCTAAACGTAGA
SL49-sm-18	AACGTTACCCTAAAGTGT
SL49-sm-19	CTGCATTATCAGTTTGCT
SL49-sm-20	CTTAACGAAGGAGTTTGT
SL49-sm-21	GCACTTCCTATTAGTGAT
SL49-sm-22	GTCAGTTATCGCTTCTGA
SL49-sm-23	ATCAGACAGGAGTAGTCT
5'ETS-1 probe
5'ETS-1-sm-1	AGAGGACAGCGTGTCAGC
5'ETS-1-sm-2	AACCTCTCCGACGACAGG
5'ETS-1-sm-3	CCGCGCGCATCCGGAGGC
5'ETS-1-sm-4	GTCACCGGTAGGCCAGAG
5'ETS-1-sm-5	GGAGCGCGGCCGGCTAGC
5'ETS-1-sm-6	CCCGGCAGGCGGCTCAAG
5'ETS-1-sm-7	GAGAGAACAGCAGGCCCG
5'ETS-1-sm-8	AGTCGGGACGCTCGGACG
5'ETS-1-sm-9	GGACCCGGGCCGGCACCG
5'ETS-1-sm-10	CCCGGGTGGGTCAGAGAC
5'ETS-1-sm-11	TCGCCCCCTTCCCCGCCG
5'ETS-1-sm-12	CGCACGGGGGCACGGTGG
5'ETS-1-sm-13	CGGGCGCCCGCAGCGGAG
5'ETS-1-sm-14	CGGGGTGGGGTTGTCGCG
5'ETS-1-sm-15	ACACGCACGGCACGGAGC
5'ETS-1-sm-16	CGCGGAGACGAGAACCCC
5'ETS-1-sm-17	GAAGGGGCGGCGGACAAC
5'ETS-1-sm-18	GGCCAACCCCCCACTCCG
5'ETS-1-sm-19	CCAGCGAGCCGATCGGCT
5'ETS-1-sm-20	AGCGGAGGCCGGCCGGCC
